# Supplementary material for: MMP2 and MMP9 serum levels are associated with favorable outcome in patients with inflammatory breast cancer treated with bevacizumab-based neoadjuvant chemotherapy in the BEVERLY-2 study
Source: PubMed Central journal article supplement (PMC4951307; doi:10.18632/oncotarget.7612), 2016-02-23
Supplement: oncotarget-07-18531-s001.pdf [file oncotarget-07-18531-s001.pdf]

SUPPLEMENTARY FIGURES AND TABLES

BEVERLY 2 Study Design

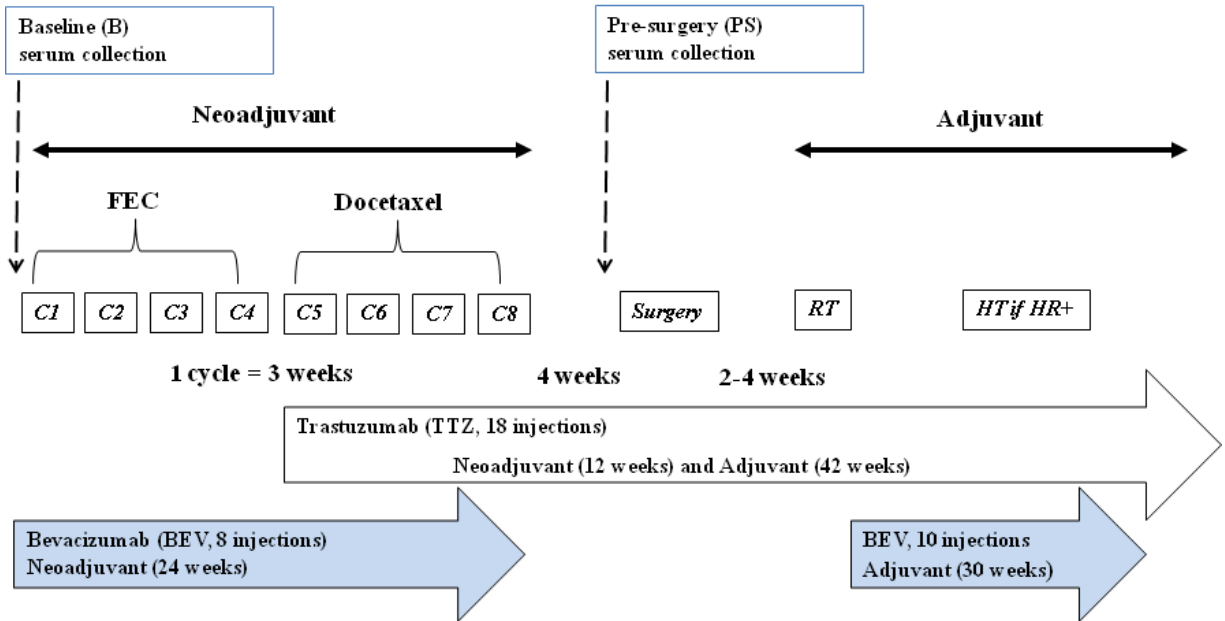

Supplementary Figure S1: Study design.

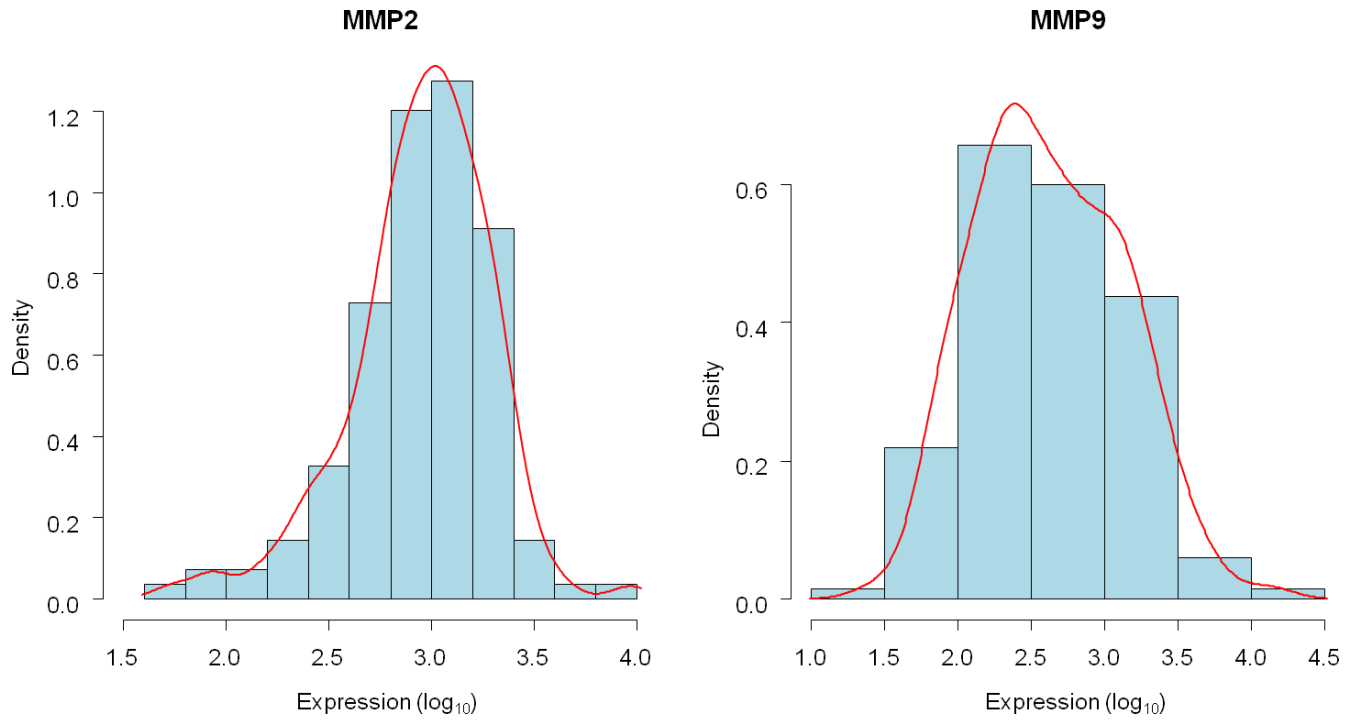

**Supplementary Figure S2: Histogram of distribution of *MMP2* and *MMP9* expression levels across the 137 IBC samples (log<sub>10</sub> scale) after normalization. The red line represents the density curve of distribution.**

**Supplementary Table S1: Correlation between MMP2 and MMP9 serum levels and patient characteristics**

|                             | Pre-CT (baseline)      |                        | Post-CT (presurgery)   |                        |
|-----------------------------|------------------------|------------------------|------------------------|------------------------|
|                             | MMP2<br><i>p</i> value | MMP9<br><i>p</i> value | MMP2<br><i>p</i> value | MMP9<br><i>p</i> value |
| <b>Age</b> (continuous)     | 0,679                  | 0,133                  | 0,743                  | 0,213                  |
| <b>Hormone receptors</b>    |                        |                        |                        |                        |
| ER-positive                 | 0,248                  | 0,061                  | 0,480                  | 0,292                  |
| PR-positive                 | 0,468                  | 0,635                  | 0,590                  | 0,681                  |
| HR-positive                 | 0,248                  | 0,061                  | 0,480                  | 0,292                  |
| <b>SBR</b> grade (1&2 vs 3) | 0,731                  | 0,273                  | 0,536                  | 0,145                  |
| <b>CTC</b>                  |                        |                        |                        |                        |
| Positive/Negative           | 0,276                  | 0,371                  | <i>NA</i>              | <i>NA</i>              |
| Continuous                  | 0,136                  | 0,430                  | <i>NA</i>              | <i>NA</i>              |
| <b>CEC</b>                  |                        |                        |                        |                        |
| Positive/Negative           | 0,531                  | 0,070                  | <i>NA</i>              | <i>NA</i>              |
| Cutoff: median              | <i>NA</i>              | <i>NA</i>              | 0,265                  | 0,571                  |
| Continuous                  | 0,946                  | 0,236                  | 0,082                  | 0,603                  |

**Supplementary Table S2: Histoclinical characteristics of 137 IBC samples (mRNA expression in pre-treatment tumor samples)**

| Characteristics*                    | N (%)             |
|-------------------------------------|-------------------|
| Age, average (min-max), years (135) | 50 (24-82)        |
| Histological type (135)             |                   |
| ductal                              | 122 (90%)         |
| lobular                             | 7 (5%)            |
| mixt                                | 3 (2%)            |
| other                               | 3 (2%)            |
| Histological grade (131)            |                   |
| 1                                   | 0 (0%)            |
| 2                                   | 30 (23%)          |
| 3                                   | 101 (77%)         |
| ER status (137)                     |                   |
| negative                            | 66 (48%)          |
| positive                            | 71 (52%)          |
| PR status (137)                     |                   |
| negative                            | 88 (64%)          |
| positive                            | 49 (36%)          |
| ERBB2 status (137)                  |                   |
| negative                            | 95 (69%)          |
| positive                            | 42 (31%)          |
| Pathological complete response (87) |                   |
| no                                  | 59 (68%)          |
| yes                                 | 28 (32%)          |
| 5-year MFS** (121)                  | 50% [95%CI 41-61] |
| Follow-up**, median (months)        | 58                |

\*, the number of cases with available information is shown between commas

\*\* , AJCC stage III patients only

**Supplementary Table S3: Correlations of MMP2 and MMP9 tumor expression levels with histo-clinical characteristics in IBC**

| Characteristics                     | N   | MMP2 groups |             | <i>p</i> value | MMP9 groups |              | <i>p</i> value |
|-------------------------------------|-----|-------------|-------------|----------------|-------------|--------------|----------------|
|                                     |     | MMP2-low    | MMP2-high   |                | MMP9-low    | MMP9-high    |                |
| Age, average (min-max), years       | 135 | 48 (24-82)  | 54 (28-78)  | 0,036          | 51 (27-82)  | 49.5 (24-80) | 0,573          |
| Histological type                   |     |             |             | 0,123          |             |              | 0,686          |
| ductal                              | 122 | 69 (95%)    | 53 (85%)    |                | 62 (87%)    | 60 (94%)     |                |
| lobular                             | 7   | 2 (3%)      | 5 (8%)      |                | 5 (7%)      | 2 (3%)       |                |
| mixt                                | 3   | 2 (3%)      | 1 (2%)      |                | 2 (3%)      | 1 (2%)       |                |
| other                               | 3   | 0 (0%)      | 3 (5%)      |                | 2 (3%)      | 1 (2%)       |                |
| Histological grade                  |     |             |             | 1,000          |             |              | 0,021          |
| 2                                   | 30  | 16 (23%)    | 14 (23%)    |                | 22 (31%)    | 8 (13%)      |                |
| 3                                   | 101 | 55 (77%)    | 46 (77%)    |                | 48 (69%)    | 53 (87%)     |                |
| ER status                           |     |             |             | 1,000          |             |              | 0,002          |
| negative                            | 66  | 36 (48%)    | 30 (48%)    |                | 25 (35%)    | 41 (62%)     |                |
| positive                            | 71  | 39 (52%)    | 32 (52%)    |                | 46 (65%)    | 25 (38%)     |                |
| PR status                           |     |             |             | 0,722          |             |              | 0,001          |
| negative                            | 88  | 47 (63%)    | 41 (66%)    |                | 36 (51%)    | 52 (79%)     |                |
| positive                            | 49  | 28 (37%)    | 21 (34%)    |                | 35 (49%)    | 14 (21%)     |                |
| ERBB2 status                        |     |             |             | 0,040          |             |              | 0,854          |
| negative                            | 95  | 58 (77%)    | 37 (60%)    |                | 50 (70%)    | 45 (68%)     |                |
| positive                            | 42  | 17 (23%)    | 25 (40%)    |                | 21 (30%)    | 21 (32%)     |                |
| Pathological complete response, pCR |     |             |             | 0,647          |             |              | 0,065          |
| no                                  | 59  | 32 (65%)    | 27 (71%)    |                | 35 (78%)    | 24 (57%)     |                |
| yes                                 | 28  | 17 (35%)    | 11 (29%)    |                | 10 (22%)    | 18 (43%)     |                |
| 5-year MFS (% [95CI])               | 121 | 45% [33-61] | 53% [40-70] | 0,437          | 47% [35-62] | 53% [41-70]  | 0,273          |

**Supplementary Table S4: Dataset of MMP2 and MMP9 expression levels (accession numbers in the ArrayExpress database: E-MTAB-1006 and E-MTAB-1547; GSE22597 in the GEO database)**

See Supplementary File 1
